# Supplementary material for: Impact of Mycoplasma ovipneumoniae on juvenile bighorn sheep ( Ovis canadensis ) survival in the northern Basin and Range ecosystem
Source: PeerJ journal article supplement (doi:10.7717/peerj.10710), 2021-01-19
Supplement: kf_juv_bhs.zip [file kf_juv_bhs.zip]

## Sheet: raw_data
		Movi_infected_lambs		Movi_PCR		Movi_ELISA				Forage
ID	EH	+	-	+	-	+	-	AR	HE	pre_part	post_part
/*W7-0118 BHP*/	1010101010110000	1	0	0	1	1	0	2.575	0.43	0.27	0.28
/*W9-0118 BHP*/	1010101000000010	1	0	0	1	1	0	2.575	0.43	0.27	0.28
/*W9b-0118 BHP*/	1010101011000000	1	0	0	1	1	0	2.575	0.43	0.27	0.28
/*W10-0118 BHP*/	1010101011000000	1	0	0	1	1	0	2.575	0.43	0.27	0.28
/*R81-0117 BSP*/	1011000000000000	0	1	0	1	0	1	1.815	0.26	0.16	0.39
/*R81-0118 BSP*/	1010110000000000	0	1	0	1	0	1	1.815	0.26	0.22	0.4
/*R79-0117 BSP*/	1010110000000000	0	1	0	1	0	1	1.815	0.26	0.16	0.39
/*B5-0116 RSP*/	1010110000000000	1	0	1	0	1	0	2.678	0.45	0.39	0.44
/*B5-0117 RSP*/	1010101100000000	1	0	1	0	1	0	2.678	0.45	0.2	0.37
/*B5-0118 RSP*/	1010101100000000	1	0	1	0	1	0	2.678	0.45	0.28	0.32
/*B15-0117 RSP*/	1010101100000000	1	0	1	0	1	0	2.678	0.45	0.2	0.37
/*B24-0116 RSP*/	1010101100000000	1	0	1	0	1	0	2.678	0.45	0.39	0.44
/*B24-0117 RSP*/	1010110000000000	1	0	1	0	1	0	2.678	0.45	0.2	0.37
/*B24-0118 RSP*/	1011000000000000	1	0	1	0	1	0	2.678	0.45	0.28	0.32
/*B9-0116 RSP*/	1010110000000000	1	0	1	0	1	0	2.678	0.45	0.39	0.44
/*B9-0117 RSP*/	1011000000000000	1	0	1	0	1	0	2.678	0.45	0.2	0.37
/*B11-0118 RSP*/	1010000000101000	1	0	1	0	1	0	2.678	0.45	0.28	0.32
/*B33-0116 RSP*/	1000001011000000	1	0	1	0	1	0	2.678	0.45	0.39	0.44
/*B33-0117 RSP*/	1011000000000000	1	0	1	0	1	0	2.678	0.45	0.2	0.37
/*B12-0116 RSP*/	1010000010101010	1	0	1	0	1	0	2.678	0.45	0.39	0.44
/*B12-0117 RSP*/	1010101100000000	1	0	1	0	1	0	2.678	0.45	0.2	0.37
/*B12-0118 RSP*/	1010101011000000	1	0	1	0	1	0	2.678	0.45	0.28	0.32
/*B23-0116 RSP*/	1011000000000000	1	0	1	0	1	0	2.678	0.45	0.39	0.44
/*B23-0117 RSP*/	1010101100000000	1	0	1	0	1	0	2.678	0.45	0.2	0.37
/*B23-0118 RSP*/	1011000000000000	1	0	1	0	1	0	2.678	0.45	0.28	0.32
/*B34-0116 RSP*/	1010101100000000	1	0	1	0	1	0	2.678	0.45	0.39	0.44
/*B34-0117 RSP*/	1010110000000000	1	0	1	0	1	0	2.678	0.45	0.2	0.37
/*B34-0118 RSP*/	1010110000000000	1	0	1	0	1	0	2.678	0.45	0.28	0.32
/*R90-0117 RSP*/	1010101011000000	1	0	1	0	1	0	2.678	0.45	0.2	0.37
/*R90-0118 RSP*/	1010110000000000	1	0	1	0	1	0	2.678	0.45	0.28	0.32
/*R89-0117 RSP*/	1010101100000000	1	0	1	0	1	0	2.678	0.45	0.2	0.37
/*R89-0118 RSP*/	1010101100000000	1	0	1	0	1	0	2.678	0.45	0.28	0.32
/*R92-0118 RSP*/	1010110000000000	1	0	1	0	1	0	2.678	0.45	0.28	0.32
/*R86-0117 RSP*/	1010101100000000	1	0	1	0	1	0	2.678	0.45	0.2	0.37
/*R86-0118 RSP*/	1010101100000000	1	0	1	0	1	0	2.678	0.45	0.28	0.32
/*R83-0117 RSP*/	1010101010101100	1	0	1	0	1	0	2.678	0.45	0.2	0.37
/*R83-0118 RSP*/	1010101010110000	1	0	1	0	1	0	2.678	0.45	0.28	0.32
/*R93-0117 RSP*/	1010110000000000	1	0	1	0	1	0	2.678	0.45	0.2	0.37
/*R91-0117 RSP*/	1010110000000000	1	0	1	0	1	0	2.678	0.45	0.2	0.37
/*R91-0118 RSP*/	1011000000000000	1	0	1	0	1	0	2.678	0.45	0.28	0.32
/*R87-0117 RSP*/	1010101100000000	1	0	1	0	1	0	2.678	0.45	0.2	0.37
/*R87-0118 RSP*/	1010101100000000	1	0	1	0	1	0	2.678	0.45	0.28	0.32
/*R84-0117 RSP*/	1010101011000000	1	0	1	0	1	0	2.678	0.45	0.2	0.37
/*R88-0117 RSP*/	1011000000000000	1	0	1	0	1	0	2.678	0.45	0.2	0.37
/*R88-0118 RSP*/	1010101100000000	1	0	1	0	1	0	2.678	0.45	0.28	0.32
/*R85-0117 RSP*/	1010110000000000	1	0	1	0	1	0	2.678	0.45	0.2	0.37
/*R85-0118 RSP*/	1011000000000000	1	0	1	0	1	0	2.678	0.45	0.28	0.32
/*G54-0118 CAL*/	1010101010101000	0	1	0	1	1	0	2.41	0.35	0.19	0.42
/*G58-0118 CAL*/	1010101100000000	0	1	0	1	1	0	2.41	0.35	0.19	0.42
/*G55-0118 CAL*/	1010101010101000	0	1	0	1	1	0	2.41	0.35	0.19	0.42
/*Y5-0217 EML*/	1010101010101000	0	1	1	0	1	0	2.656	0.48	0.31	0.57
/*Y5-0118 EML*/	1011000000000000	0	1	1	0	1	0	2.656	0.48	0.32	0.56
/*Y6-0217 EML*/	1010110000000000	0	1	1	0	1	0	2.656	0.48	0.31	0.57
/*Y6-0118 EML*/	1010101010101000	0	1	1	0	1	0	2.656	0.48	0.32	0.56
/*Y7-0217 EML*/	1010101011000000	0	1	1	0	1	0	2.656	0.48	0.31	0.57
/*Y7-0118 EML*/	1010101010101000	0	1	1	0	1	0	2.656	0.48	0.32	0.56
/*Y8-0217 EML*/	1010110000000000	0	1	1	0	1	0	2.656	0.48	0.31	0.57
/*Y8-0118 EML*/	1000001010100000	0	1	1	0	1	0	2.656	0.48	0.32	0.56
/*G52-0118 EML*/	1000000010100000	0	1	1	0	1	0	2.656	0.48	0.32	0.56
/*G51-0118 EML*/	1010101010100000	0	1	1	0	1	0	2.656	0.48	0.32	0.56
/*Y1-0217 MCK*/	1010101010101010	0	1	0	1	1	0	2.501	0.36	0.22	0.4
/*Y1-0118 MCK*/	1010101010101000	0	1	0	1	1	0	2.501	0.36	0.26	0.41
/*Y1b-0118 MCK*/	1010101010101000	0	1	0	1	1	0	2.501	0.36	0.26	0.41
/*Y2-0217 MCK*/	1010101010101010	0	1	0	1	1	0	2.501	0.36	0.22	0.4
/*Y2-0218 MCK*/	1010101010101000	0	1	0	1	1	0	2.501	0.36	0.26	0.41
/*Y4-0217 MCK*/	1010101010101010	0	1	0	1	1	0	2.501	0.36	0.22	0.4
/*Y4-0118 MCK*/	1010101010101000	0	1	0	1	1	0	2.501	0.36	0.26	0.41
/*G60-0118 MCK*/	1010110000000000	0	1	0	1	1	0	2.501	0.36	0.26	0.41
/*Y9-0217 SAW*/	1000000010110000	0	1	0	1	1	0	2.88	0.42	0.3	0.42
/*Y9-0118 SAW*/	1010101010101000	0	1	0	1	1	0	2.88	0.42	0.27	0.38
/*Y10-0217 SAW*/	1010101010101000	0	1	0	1	1	0	2.88	0.42	0.3	0.42
/*Y10-0118 SAW*/	1010101010101010	0	1	0	1	1	0	2.88	0.42	0.27	0.38
/*Y11-0217 SAW*/	1010000011000000	0	1	0	1	1	0	2.88	0.42	0.3	0.42
/*Y11-0118 SAW*/	1010101010101100	0	1	0	1	1	0	2.88	0.42	0.27	0.38
/*B48-0116 TCE*/	1000101000000000	0	1	0	1	0	1	1.994	0.32	0.31	0.49
/*B48-0117 TCE*/	1010000010100000	0	1	0	1	0	1	1.994	0.32	0.23	0.5
/*B47-0116 TCE*/	1010000010101000	0	1	0	1	0	1	1.994	0.32	0.31	0.49
/*B56-0116 TCE*/	1000000011000000	0	1	0	1	0	1	1.994	0.32	0.31	0.49
/*B42-0116 TCE*/	1000000010101000	0	1	0	1	0	1	1.994	0.32	0.31	0.49
/*B42-0117 TCE*/	1000001010100000	0	1	0	1	0	1	1.994	0.32	0.23	0.5
/*B42-0118 TCE*/	1010101010000000	0	1	0	1	0	1	1.994	0.32	0.21	0.43
/*B43-0116 TCE*/	1010000010101010	0	1	0	1	0	1	1.994	0.32	0.31	0.49
/*B43-0117 TCE*/	1010101010101100	0	1	0	1	0	1	1.994	0.32	0.23	0.5
/*B40-0116 TCE*/	1010000010101010	0	1	0	1	0	1	1.994	0.32	0.31	0.49
/*B40-0117 TCE*/	1011000000000000	0	1	0	1	0	1	1.994	0.32	0.23	0.5
/*B38-0116 TCE*/	1000000000100000	0	1	0	1	0	1	1.994	0.32	0.31	0.49
/*B38-0117 TCE*/	1010101010110000	0	1	0	1	0	1	1.994	0.32	0.23	0.5
/*R100-0117 TCE*/	1010101010100000	0	1	0	1	0	1	1.994	0.32	0.23	0.5
/*R99-0117 TCE*/	1000001010100000	0	1	0	1	0	1	1.994	0.32	0.23	0.5
/*R99-0118 TCE*/	1010101010100000	0	1	0	1	0	1	1.994	0.32	0.21	0.43
/*B54-0117 TCS*/	1100000000000000	0	1	0	1	0	1	1.89	0.28	0.29	0.46
/*B54-0118 TCS*/	1011000000000000	0	1	0	1	0	1	1.89	0.28	0.25	0.42
/*B45-0116 TCS*/	1011000000000000	0	1	0	1	0	1	1.89	0.28	0.32	0.42
/*B45-0117 TCS*/	1010110000000000	0	1	0	1	0	1	1.89	0.28	0.29	0.46
/*R3-0117 TCS*/	1010100000000000	0	1	0	1	0	1	1.89	0.28	0.29	0.46
/*R3-0118 TCS*/	1010101010000000	0	1	0	1	0	1	1.89	0.28	0.25	0.42
/*W8-0118 TCS*/	1010101010101010	0	1	0	1	0	1	1.89	0.28	0.25	0.42
/*B59-0116 TCW*/	1010100000100000	0	1	0	1	0	1	2.017	0.33	0.36	0.47
/*B59-0117 TCW*/	1010101010100000	0	1	0	1	0	1	2.017	0.33	0.24	0.41
/*B59-0118 TCW*/	1010000010101000	0	1	0	1	0	1	2.017	0.33	0.27	0.4
/*B58-0116 TCW*/	1010101000001010	0	1	0	1	0	1	2.017	0.33	0.36	0.47
/*B58-0117 TCW*/	1011000000000000	0	1	0	1	0	1	2.017	0.33	0.24	0.41
/*B58-0118 TCW*/	1010110000000000	0	1	0	1	0	1	2.017	0.33	0.27	0.4
/*W3-0118 TCW*/	1010110000000000	0	1	0	1	0	1	2.017	0.33	0.27	0.4
/*B27-0116 TMP*/	1010101100000000	0	1	0	1	1	0	2.699	0.46	0.38	0.44
/*B27-0118 TMP*/	1000001010100000	0	1	0	1	1	0	2.699	0.46	0.28	0.4
/*B26-0116 TMP*/	1011000000000000	0	1	0	1	1	0	2.699	0.46	0.38	0.44
/*B26-0117 TMP*/	1010101010100000	0	1	0	1	1	0	2.699	0.46	0.32	0.43
/*B26-0118 TMP*/	1000001100000000	0	1	0	1	1	0	2.699	0.46	0.28	0.4
/*B30-0116 TMP*/	1010101010100000	0	1	0	1	1	0	2.699	0.46	0.38	0.44
/*B30-0117 TMP*/	1010101010100000	0	1	0	1	1	0	2.699	0.46	0.32	0.43
/*B30-0118 TMP*/	1000001100000000	0	1	0	1	1	0	2.699	0.46	0.28	0.4
/*B3-0116 UOP*/	1010000000000000	0	1	0	1	1	0	2.375	0.33	0.47	0.41
/*B3-0117 UOP*/	1010000000000000	0	1	0	1	1	0	2.375	0.33	0.23	0.42
/*B6-0116 UOP*/	1000001100000000	0	1	0	1	1	0	2.375	0.33	0.47	0.41
/*B6-0117 UOP*/	1010101010000010	0	1	0	1	1	0	2.375	0.33	0.23	0.42
/*B1-0116 UOP*/	1010101010000000	0	1	0	1	1	0	2.375	0.33	0.47	0.41
/*B4-0116 UOP*/	1010000010100000	0	1	0	1	1	0	2.375	0.33	0.47	0.41
/*B4-0117 UOP*/	1010101000001100	0	1	0	1	1	0	2.375	0.33	0.23	0.42
/*B22-0116 UOP*/	1010110000000000	0	1	0	1	1	0	2.375	0.33	0.47	0.41
/*B22-0117 UOP*/	1010000010000000	0	1	0	1	1	0	2.375	0.33	0.23	0.42

## Sheet: fig_2A
Movi	Time	Pr	LB	UB	SE
+	0.5	1	1	1	0
-	0.5	0.99	0.91	1	0.01
+	1	0.81	0.67	0.9	0.06
-	1	0.89	0.78	0.95	0.04
+	1.5	0.7	0.52	0.83	0.08
-	1.5	0.81	0.67	0.9	0.06
+	2	0.42	0.24	0.62	0.1
-	2	0.88	0.75	0.95	0.05
+	2.5	0.4	0.16	0.7	0.15
-	2.5	0.94	0.82	0.98	0.04
+	3	0.6	0.2	0.9	0.22
-	3	0.95	0.82	0.99	0.03
+	3.5	0.67	0.15	0.96	0.27
-	3.5	0.88	0.69	0.96	0.06
+	4	0.5	0.06	0.94	0.35
-	4	0.89	0.5	0.98	0.1

## Sheet: fig_2B
Movi	Time	Mean	LB	UB	SE
+	0.5	1	1	1	0
+	1	0.813953	0.669919	0.904131	0.0593439
+	1.5	0.567301	0.414569	0.70823	0.0771422
+	2	0.236375	0.131922	0.386693	0.0655166
+	2.5	0.0945502	0.0359073	0.22647	0.0450306
+	3	0.0567301	0.0169891	0.173067	0.0340455
+	3.5	0.0378201	0.00888117	0.147063	0.0274508
+	4	0.01891	0.00253916	0.127353	0.019162
-	0.5	0.987013	0.913559	0.998174	0.0129024
-	1	0.877345	0.773067	0.937575	0.0407282
-	1.5	0.709343	0.579381	0.812167	0.0601655
-	2	0.626861	0.496717	0.740906	0.0634778
-	2.5	0.586849	0.459514	0.703538	0.0634906
-	3	0.558222	0.432652	0.676763	0.0635384
-	3.5	0.491235	0.364061	0.619554	0.0666528
-	4	0.436653	0.29317	0.591587	0.0784754
